# Supplementary material for: Effect of 32-Weeks High-Intensity Interval Training and Resistance Training on Delaying Sarcopenia: Focus on Endogenous Apoptosis
Source: Front Physiol. 2022 Apr 28;13:811369. doi: 10.3389/fphys.2022.811369 (PMC9095960; doi:10.3389/fphys.2022.811369)
Supplement: Supplementary file 1 [file Table1.XLSX]

## Sheet: CSA
Baseline	8C	8H	8R	16C	16H	16R	24C	24H	24R	32C	32H	32R
3627.14	3367.02	3965.88	4344.17	3237.35	4004.5	3797.4	3669.44	3943.31	3767.38	2905.96	3435.77	4156.88
3556.43	3516.06	3855.58	4333.19	3501.2	3277.65	4636.32	3217.28	3469.6	3147.35	3249.74	4017.55	4196.3
3650.91	3047.79	3301.38	4172.41	3185.18	3913.45	3892.28	3473.11	3394.93	3778.7	3064.61	3815.18	4519.41
3302.49	3651.91	3983.47	4673.03	3539.66	3905.56	3625.31	2944.81	3561.77	3580.92	2861.65	3988.29	4399.21
3872.63	3232.81	3430.8	4134.38	3306.17	3627.01	3613.68	3365.64	3402.82	3743.1	2952.39	3745.8	4369.28

## Sheet: SMI
Baseline	8C	8H	8R	16C	16H	16R	24C	24H	24R	32C	32H	32R
0.80729	0.778872	0.903565	1.05787	0.867467	0.84054	0.974658	0.911042	0.975358	1.03697	0.91164	0.835332	1.22833
0.826891	0.923077	1.02477	0.922242	0.824718	1.00196	0.738371	0.900028	1.09205	1.02427	0.71352	0.910878	1.01946
0.831333	0.790594	0.894317	0.964759	0.88553	1.00688	1.29927	0.86592	0.810804	0.726722	0.73979	0.985588	1.11739
0.849373	1.00429	0.830771	0.91163	0.787154	0.958271	1.1382	0.807852	0.899586	0.808847	0.874941	0.898961	0.919208
0.882205	0.884917	1.00602	0.891242	0.887939	1.10601	0.892868	0.951056	0.722964	1.13646	0.800979	0.844714	0.983907
0.9793	0.882149	0.899936	1.09044	0.799019	1.15241	0.986403	0.880162	0.968419	0.824741	0.666588	1.21767	0.880097
0.887596	0.857807	0.871463	1.06692	1.00461	0.895196	0.775827	0.960093	0.76504	0.89308	0.656561	0.82865	1.08161
0.8518	0.950663	1.09354	1.02831	0.925931	1.0609	0.975144	0.883887	1.01647	1.04434	0.733486	0.959054	1.10598
0.873251	0.723778		0.732666			1.48501		1.00588	0.777697	0.621566	0.889135
0.944615	0.956263		0.974					0.889135	0.846012	0.805651

## Sheet: ROS
Baseline	8C	8H	8R	16C	16H	16R	24C	24H	24R	32C	32H	32R
93.058	79.675	60.177	77.395	68.759	67.365	71.602	69.752	71.468	75.008	91.073	73.372	115.023
76.752	99.2	65.809	76.188	74.231	77.181	64.763	79.38	68.974	71.495	105.154	76.618	88.82
66.614	94.238	67.687	50.388	71.736	67.284	67.472	65.3	74.955	60.526	82.518	64.388	94.292
91.824	77.583	77.476	74.15	88.606	74.552	91.395	77.047	80.855	73.828	90.108	71.978	95.525
86.809	107.943	68.089	70.53	88.418	81.981	96.705	81.821	66.909	79.219	90.376	73.507	114.165

## Sheet: Bcl-2
Baseline	8C	8H	8R	16C	16H	16R	24C	24H	24R	32C	32H	32R
1	0.300048	0.906532	1.30395	0.905316	0.978851	1.38803	0.203931	0.293167	0.0517536	0.241429	0.795788	0.313294
1	0.468025	1.02369	0.538914	0.650702	0.554989	0.849546	0.135515	0.329758	0.103784	0.106863	0.48162	0.100128
1	0.578203	0.791686	1.09861	0.268908	0.497203	0.341567	0.118309	0.698174	0.109953	0.132252	0.69922	0.075655
1	0.343304	1.07514	0.817283	0.484815	0.982316	1.03518	0.147624	0.504794	0.0240196	0.172795	0.259452	0.27264
1	0.368553	0.395973	0.925764	0.59165	0.340013	0.693144	0.18987	0.158564	0.0533071	0.0713976	0.395805	0.207624
1	0.399729	1.06286	1.06996	0.576705	0.319863	0.504049	0.170766	0.19521	0.0975342	0.158031	0.4832	0.168611
1	0.744543	0.484141	0.73279	0.501326	0.813806	0.933388	0.0704731	0.727055	0.122019	0.0644072	0.943974	0.198557
1	0.318297	0.668882	0.947267	0.71758	0.484155	0.420436	0.140852	0.458754	0.076323	0.135989	0.479755	0.0747605
1	0.629571	0.833332	1.10523	0.71118	0.532698	0.976904	0.126529	0.229623	0.0290794	0.0810828	0.414069	0.120648
1	0.411236	0.599741	1.18128	0.613275	0.41152	0.855244	0.146727	0.346	0.0468552	0.0961113	0.570456	0.0981155

## Sheet: BAX
Baseline	8C	8H	8R	16C	16H	16R	24C	24H	24R	32C	32H	32R
1	0.587345	0.403024	0.503993	0.795181	0.941118	0.902426	0.747764	0.833309	0.635622	0.38154	0.564039	0.514744
1	0.982405	0.466947	0.339827	0.486106	0.422858	0.436593	0.352201	0.389936	0.285448	0.492516	0.340255	0.660579
1	0.508932	0.521221	0.704883	0.444246	0.33584	0.508979	0.354626	0.274137	0.441292	1.09332	0.476438	0.364929
1	0.75484	0.615753	0.678928	1.46057	1.23062	1.28357	0.961258	0.653504	0.88945	0.986262	0.831242	0.651453
1	1.154	1.49196	1.51236	2.21089	1.97759	2.04169	1.96633	1.57009	1.39129	0.853642	0.956578	0.968969
1	0.878372	0.832493	1.18735	1.16767	1.54041	3.24171	2.53206	1.71298	1.1967	0.618864	1.27117	1.28172
1	1.15661	0.733005	0.723129	1.21314	1.37002	1.22129	1.06838	0.731741	0.865017	0.663315	0.9633	1.10631
1	0.871116	0.708864	0.848052	1.0512	1.23175	1.29376	1.0729	0.916616	0.711306	0.353646	0.877236	0.457783
1	0.512432	0.479717	0.511382	0.437048	0.35308	0.262183	0.214075	0.264317	0.279187	1.24118	0.562918
1	1.02039	1.39154	1.24549	1.32212	2.26231	2.04097	1.64354	1.3019	1.4563

## Sheet: Cyt-C
Baseline	8C	8H	8R	16C	16H	16R	24C	24H	24R	32C	32H	32R
1	1.08396	1.01721	1.46975	1.27166	1.26659	0.826287	0.983255	1.54249	1.3925	0.860742	1.09924	0.411138
1	0.817626	0.805538	1.0423	0.994983	0.727268	0.481785	0.992968	1.16547	1.01578	0.709649	0.834704	0.337325
1	1.7667	1.70228	1.51716	0.915136	0.392836	1.39847	1.68747	1.53105	1.32809	1.29306	0.773745	0.896397
1	1.19869	1.6598	1.96289	1.37539	0.729686	1.4956	1.60598	1.68884	1.49573	0.954441	0.826191	0.793379
1	0.80722	1.0067	0.912386	1.04912	0.7063	1.01298	0.857673	1.01696	0.857102	0.890869	0.778124	0.736724
1	0.900517	1.21044	1.05305	1.10254	0.831194	1.07486	0.863725	1.24311	1.15872	1.32681	1.08571	1.08295
1	0.559007	0.713578	1.10335	0.650798	0.571601	0.784546	0.33773	0.770683	0.742121	0.548348	0.371895	0.320272
1	0.877543	1.69695	2.03491	1.22458	0.987302	1.2375	0.80768	1.34401	1.54886	1.0131	0.536391	0.533809

## Sheet: Caspase-9
Baseline	8C	8H	8R	16C	16H	16R	24C	24H	24R	32C	32H	32R
1	0.767136	0.90731	0.663397	0.693839	0.500038	0.495659	0.373319	0.517254	0.455635	0.462839	0.419753	0.328043
1	0.836684	0.402129	0.728486	1.00634	1.11665	0.653426	0.575105	1.29016	2.58446	0.318148	2.85157	1.39473
1	0.849273	0.980855	0.807381	0.831085	0.848017	0.859308	0.644287	0.748202	0.424055	0.765486	0.362451	0.363045
1	0.883396	0.836482	0.653004	0.735436	0.631092	0.710514	0.634135	0.74209	0.551019	0.537096	0.459055	0.334315
1	0.826177	0.966322	0.84565	0.84565	0.70248	0.729773	0.780464	0.868496	0.77371	0.451672	0.281427	0.218032
1	0.686249	0.899302	0.75752	0.889724	0.731993	0.803603	0.636297	0.636297	0.542748	0.542219	0.401232	0.389249
1	0.994228	1.09767	0.77663	0.765252	0.550172	0.626156	0.449999	0.754809	0.536825	0.55094	0.398267	0.240091
1	1.02675	0.981355	0.670884	0.656376	0.74104	0.64921	0.665388	0.710239	0.628245	0.422717	0.253356	0.301146

## Sheet: Caspase-3
Baseline	8C	8H	8R	16C	16H	16R	24C	24H	24R	32C	32H	32R
1	0.625092	0.583395	0.443193	0.45855	0.661357	0.69796	0.287258	0.518163	0.465143	0.44666	0.219462	0.187772
1	0.667547	0.740983	0.456405	0.50473	0.748013	0.859192	0.258657	0.382246	0.316534	0.440678	0.279612	0.182175
1	0.406393	0.784675	0.556031	0.569304	0.526886	0.828758	0.345065	0.391331	0.348112	0.318089	0.374055	0.266722
1	0.56598	1.07706	0.678711	0.827596	0.806026	1.33004	0.789126	0.741921	0.760618	0.497427	0.660337	0.398951
1	0.339876	1.20999	0.442761	0.640552	0.556904	0.661938	0.305066	0.430411	0.26333	0.623878	0.186044	0.151524
1	0.271625	1.312	0.577812	0.885985	0.585213	0.870567	0.293314	0.568466	0.263557	0.72302	0.235442	0.161934
1	0.500815	0.90133	0.727654	0.235023	0.372992	0.883812	0.470626	0.448082	0.315009	0.557468	0.193297	0.12357
1	0.547207	0.847697	0.628352	0.324185	0.462195	0.929193	0.620272	0.529785	0.353372	0.608351	0.255803	0.195539
